# Supplementary material for: Balancing Benefits and Harms of COVID-19 Vaccines: Lessons from the Ongoing Mass Vaccination Campaign in Lombardy, Italy
Source: MDPI journal article supplement (doi:10.3390/vaccines10040623), 2022-04-15
Supplement: s1 [file s1]

# Supplementary material

## Balancing Benefits and Harms of COVID-19 Vaccines: Lessons from the Ongoing Mass Vaccination Campaign in Lombardy, Italy

Giovanni Corrao <sup>1,2,\*</sup>, Federico Rea <sup>1,2</sup>, Matteo Franchi <sup>1,2</sup>, Danilo Cereda <sup>3</sup>, Antonio Barone <sup>4</sup>, Catia Rosanna Borriello <sup>3</sup>, Giulia Petra Della Valle <sup>3</sup>, Michele Ercolanoni <sup>4</sup>, Jose Jara <sup>4</sup>, Giuseppe Preziosi <sup>4</sup>, Manuel Maffeo <sup>3</sup>, Francesco Mazziotto <sup>3</sup>, Elisabetta Pierini <sup>3</sup>, Francesco Lecis <sup>5</sup>, Pierfrancesco Sanchirico <sup>5</sup>, Francesco Vignali <sup>5</sup>, Olivia Leoni <sup>3</sup>, Ida Fortino <sup>3</sup>, Massimo Galli <sup>6,7</sup>, Giovanni Pavesi <sup>3</sup> and Guido Bertolaso <sup>8</sup>

<sup>1</sup> National Centre for Healthcare Research and Pharmacoepidemiology, University of Milano-Bicocca, 20126 Milan, Italy; federico.rea@unimib.it (F.R.); matteo.franchi@unimib.it (M.F.)

<sup>2</sup> Unit of Biostatistics, Epidemiology and Public Health, Department of Statistics and Quantitative Methods, University of Milano-Bicocca, 20126 Milan, Italy

<sup>3</sup> Directorate General for Health, Lombardy Region, 20124 Milan, Italy; danilo\_cereda@regione.lombardia.it (D.C.); catia\_rosanna\_borriello@regione.lombardia.it (C.R.B.); dellavalle\_petra\_stg@regione.lombardia.it (G.P.D.V.); manuel.maffeo@unimi.it (M.M.); francesco.mazziotto@unimi.it (F.M.); elisabetta.pierini@unimi.it (E.P.); olivia\_leoni@regione.lombardia.it (O.L.); ida\_fortino@regione.lombardia.it (I.F.); giovanni\_pavesi@regione.lombardia.it (G.P.)

<sup>4</sup> ARIA S.p.a., 20124 Milan, Italy; antonio.barone@ariaspa.it (A.B.); michele.ercolanoni@ariaspa.it (M.E.); jose.jara@ext.ariaspa.it (J.J.); giuseppe.preziosi@ariaspa.it (G.P.)

<sup>5</sup> EY Advisory, 00187 Rome, Italy; francesco.lecis@it.ey.com (F.L.); pierfrancesco.sanchirico@it.ey.com (P.S.); francesco.vignali@it.ey.com (F.V.)

<sup>6</sup> Infectious Diseases Unit, Luigi Sacco Hospital, 20157 Milan, Italy; massimo.galli@unimi.it

<sup>7</sup> Department of Biomedical and Clinical Sciences, University of Milan, 20157 Milan, Italy

<sup>8</sup> Management of the Vaccination Campaign, Lombardy Region, 20124 Milan, Italy; bertolaso1@gmail.com

\* Correspondence: giovanni.corrao@unimib.it; Tel.: +39-02-64485854

**Section S1.** Formal justification for choosing the number of controls to be matched with each vaccinated citizen

From a statistical standpoint, sample size calculations for Poisson-distributed data are characterized by the parameter  $\lambda$ , which is the number of events, divided by the number of the considered units (e.g., person-months). Sample size calculations to test the hypothesis that the true incidence rates in two groups of individuals are equal, the approach by Lwanga & Lemeshow was used [30]. As an example, consider the age-gender category in which we expect that Covid-19 related events to be less frequent, that is women under 50 years of age. Let the mean count of Covid-19 related outcome (i.e., the event which vaccine should prevent) to be 5 events per 10,000 person-months uncovered by vaccine exposure ( $\lambda_0 = 0.0005$ , accumulated during a given amount of person-months,  $PM_0$ ). If we want to appreciate an at least one-half decreased rate during person-months covered by vaccine exposure ( $\lambda_1=0.00025$ , accumulated during a given amount of  $PM_1$ ), with a power of 0.80 and a one-side first type error of 0.05, we should ensure that at least 94,187 person-months are accumulated by both the vaccinated cohort members and by the 1:1 matched controls.

Let consider now the harmful events possibly be due to vaccine exposure, such as the venous thromboembolic outcomes took into account in the current study. With respect to our line of reasoning, the only change is the expected frequency of the event, which in this case is expected to be rarer (say,  $\lambda_0 = 0.00003$  always among the women under 50 years of age). In this case, by including 100,000 person-months we should be able of appreciating increased rate of 5-fold or more (i.e.,  $\lambda_1 = 0.00015$ ). As we were interested of appreciating a 3-fold increased rate during periods covered by vaccine exposure, we reasoned on the opportunity of increasing the number of controls to be matched to each vaccinated person for reaching the desiderate minimum appreciable

incidence rate ratio. For this reason, a 1:10 matched design was adopted for estimating vaccine safety

**Table S1.** List of conditions used for typifying vaccinated cohort members and unvaccinated controls.

| Diagnostic categories                                                 | #  | Disease / condition                                                                     | ICD-9 CM                                                                                                                                                                         | ATC                                                                                                                             |
|-----------------------------------------------------------------------|----|-----------------------------------------------------------------------------------------|----------------------------------------------------------------------------------------------------------------------------------------------------------------------------------|---------------------------------------------------------------------------------------------------------------------------------|
| Infectious and parasitic diseases                                     | 1  | HIV infection                                                                           | 042.x, V08                                                                                                                                                                       | J05AB14, J05AE, J05AF01, J05AF02, J05AF04, J05AF05, J05AF06, J05AF09, J05AG, J05AR, J05AX07, J05AX08, J05AX09, J05AX12<br>J04AB |
|                                                                       | 2  | Tuberculosis and Other infectious and parasitic diseases                                | 010.x - 018.x, 001.x-009.x, 020.x-027.x, 030.x-041.x, 045.x-057.x, 060.x-066.x, 070.x-088.x, 090.x-104.x, 110.x-118.x, 120.x-139.x                                               |                                                                                                                                 |
| Neoplasms                                                             | 3  | Solid malignancies and Neoplasm of lymphatic and haematopoietic tissue                  | 140.x-165.x, 170.x-176.x, 179.x-199.x, V58.0, 92.2, 200.x-208-x                                                                                                                  | L01, L03AC, L02BA01, L02BA02, L02BG02, L02BG03, L02BG04, L02BG06, L02BB01, L02BB03, L02AE02, L02AE04, L02AB01                   |
| Endocrine, nutritional and metabolic diseases, and immunity disorders | 4  | Benign neoplasm and carcinoma in situ                                                   | 210.x-234.x                                                                                                                                                                      | H03A, H03B                                                                                                                      |
|                                                                       | 5  | Hypothyroidism                                                                          | 243, 244.x                                                                                                                                                                       |                                                                                                                                 |
|                                                                       | 6  | Hyper e hypoparathyroidism                                                              | 252.0, 252.1                                                                                                                                                                     | A10B<br>A10A<br>C10                                                                                                             |
|                                                                       | 7  | Diabetes without insulin therapy                                                        | 250.x, 348.0x, 357.2, 362.0, 366.41                                                                                                                                              |                                                                                                                                 |
|                                                                       | 8  | Insulin therapy                                                                         |                                                                                                                                                                                  | M04AC01, M04AA, M04AB                                                                                                           |
|                                                                       | 9  | Dyslipidaemia                                                                           | 272.2, 272.4                                                                                                                                                                     |                                                                                                                                 |
|                                                                       | 10 | Obesity                                                                                 | 278.0x                                                                                                                                                                           |                                                                                                                                 |
|                                                                       | 11 | Weight loss                                                                             | 260-263.x                                                                                                                                                                        |                                                                                                                                 |
|                                                                       | 12 | Disorders of fluid, electrolyte, and acid-base balance                                  | 276.x                                                                                                                                                                            |                                                                                                                                 |
|                                                                       | 13 | Gout                                                                                    | 274.x                                                                                                                                                                            |                                                                                                                                 |
|                                                                       | 14 | Other disorders of endocrine, nutritional and metabolic diseases                        | 240.x-242.x, 245.x, 246.x, 249.x, 251.x, 252.8, 252.9, 253.x-259.x, 264.x-269.x, 270.x, 271.x, 272.0, 272.1, 272.3, 272.5-272.9, 273.x, 275.x, 277.x, 278.1-278.8 (except 277.0) |                                                                                                                                 |
|                                                                       | 15 | Disorders involving the immune mechanisms                                               | 279.x                                                                                                                                                                            |                                                                                                                                 |
| Diseases of the blood and blood-forming organs                        | 16 | Coagulation defects                                                                     | 286.x                                                                                                                                                                            | B02B                                                                                                                            |
|                                                                       | 17 | Autoimmune haemolytic anaemias, Other anaemias, Anaemias only tracked from drug therapy | 280.x-282.x, 283.1-283.9, 284.x-285.x                                                                                                                                            | B03A, B03B, B03XA01, L03AA                                                                                                      |
|                                                                       | 18 | Other diseases of the blood and blood-forming organs                                    | 287.x-289.x                                                                                                                                                                      |                                                                                                                                 |
| Mental disorders                                                      | 19 | Dementia / Alzheimer                                                                    | 290.0-290.4x, 331.0x                                                                                                                                                             | N06DA, N06DX01                                                                                                                  |

|                                                 |    |                                                       |                                                                                                                                                                                                                                              |                                                                                                                                       |
|-------------------------------------------------|----|-------------------------------------------------------|----------------------------------------------------------------------------------------------------------------------------------------------------------------------------------------------------------------------------------------------|---------------------------------------------------------------------------------------------------------------------------------------|
|                                                 | 20 | Psychosis                                             | 295.x, 297.x, 298.2-298.9, 299.1x                                                                                                                                                                                                            | N05AD, N05AA, N05AB, N05AC, N05AX, N05AE, N05AF, N05AG, N05AH, N05AL                                                                  |
|                                                 | 21 | Depression                                            | 296.2, 296.3, 296.82, 298.0, 300.4, 301.12, 309.0x, 309.1x, 311.x                                                                                                                                                                            | N06A                                                                                                                                  |
|                                                 | 22 | Bipolar disorders                                     | 296.0x, 296.1x, 296.4x, 296.5x, 296.6x, 296.7x, 296.80, 296.81, 296.89, 296.9x, 298.1x                                                                                                                                                       | N05AN                                                                                                                                 |
|                                                 | 23 | Alcohol abuse                                         | 291.1, 291.2, 291.5, 291.8x, 291.9, 303.9, 305.0x, V11.3x                                                                                                                                                                                    | N07BB01                                                                                                                               |
|                                                 | 24 | Drug addiction                                        | 292.0x, 292.82-292.89, 292.9x, 304.x, 305.2x-305.9x                                                                                                                                                                                          | N07BB04                                                                                                                               |
|                                                 | 25 | Anxiety                                               | 300.0x                                                                                                                                                                                                                                       | N05BA, N05BB01, N05CD, N05BC01, N05BC51, N05BX, N05CF, N05CX01, N06BX                                                                 |
|                                                 | 26 | Other mental disorders                                | 290.8, 290.9, 291.0, 291.3, 291.4, 292.1x, 292.2, 292.81, 293.x, 294.x, 299.0x, 299.8x, 299.9x, 300.0x-300.2x, 300.3, 300.5-300.9, 301.0, 301.10, 301.11, 301.2x-301.9x, 302.x, 303.x, 305.1, 306.x-308.x, 309.2x-309.4x, 310.x, 312.x-319.x |                                                                                                                                       |
| Diseases of the nervous system and sense organs | 27 | Parkinson's disease and parkinsonism                  | 332.x                                                                                                                                                                                                                                        | N04                                                                                                                                   |
|                                                 | 28 | Multiple sclerosis                                    | 340                                                                                                                                                                                                                                          | L03AB07, L03AB08, L04AA23, L04AA27, L03AX13, L04AA31, L04AA34, L03AB13, L04AX07                                                       |
|                                                 | 29 | Epilepsy and recurrent seizures                       | 345.x                                                                                                                                                                                                                                        | N03AF01, N03AB02, N03AA02, N03AA03, N03AA04, N03AE01, N03AD01, N03AG01, N05BA09, N03AG04, N03AX10, N03AG06, N03AF02, N03AX14, N03AX15 |
|                                                 | 30 | Glaucoma                                              | 365.x                                                                                                                                                                                                                                        | S01E                                                                                                                                  |
|                                                 | 31 | Disorders of the eye and adnexa                       | 360.x-379.x (except 365.x)                                                                                                                                                                                                                   |                                                                                                                                       |
|                                                 | 32 | Diseases of the ear and mastoid process               | 380.x-389.x                                                                                                                                                                                                                                  |                                                                                                                                       |
|                                                 | 33 | Other diseases of the nervous system and sense organs | 320.x-326.x, 330.x-331.x, 333.x-337.x, 340.x-344.x, 346.x-359.x                                                                                                                                                                              |                                                                                                                                       |
| Diseases of the circulatory system              | 34 | Ischaemic Heart Disease/Angina                        | 410.x – 414                                                                                                                                                                                                                                  | C01DA, C01DX                                                                                                                          |
|                                                 | 35 | Heart failure                                         | 398.91, 402.11, 402.91, 404.11, 404.13, 404.91, 404.93, 428.x                                                                                                                                                                                |                                                                                                                                       |
|                                                 | 36 | Arrhythmia                                            | 426.10, 426.11, 426.13, 426.20-426.53, 426.60-426.89, 427.0, 427.2,                                                                                                                                                                          | C01BA, C01BC, C01BD                                                                                                                   |

|                                    |                                                                                                              |                                                                                                                                                                                                                                                                                          |                                                                                                                                                                                                                                                                                                                                                                                                                                                                                                                                             |
|------------------------------------|--------------------------------------------------------------------------------------------------------------|------------------------------------------------------------------------------------------------------------------------------------------------------------------------------------------------------------------------------------------------------------------------------------------|---------------------------------------------------------------------------------------------------------------------------------------------------------------------------------------------------------------------------------------------------------------------------------------------------------------------------------------------------------------------------------------------------------------------------------------------------------------------------------------------------------------------------------------------|
|                                    |                                                                                                              | 427.31, 427.60, 427.9, 785.0x, V45.0x, V53.3x                                                                                                                                                                                                                                            |                                                                                                                                                                                                                                                                                                                                                                                                                                                                                                                                             |
|                                    | 37 Valvular diseases                                                                                         | 093.20-093.24, 394.0x-397.1x, 424.00-424.91, 746.3x-746.6x, V42.2x, V43.3x                                                                                                                                                                                                               |                                                                                                                                                                                                                                                                                                                                                                                                                                                                                                                                             |
|                                    | 38 Vascular diseases                                                                                         | 440.x, 441.2, 441.4, 441.7, 441.9, 443.1x-443.9x, 447.1, 557.1x, 557.9x, 785.4x, V43.4x                                                                                                                                                                                                  |                                                                                                                                                                                                                                                                                                                                                                                                                                                                                                                                             |
|                                    | 39 Cerebrovascular diseases                                                                                  | 430.x-438.x                                                                                                                                                                                                                                                                              |                                                                                                                                                                                                                                                                                                                                                                                                                                                                                                                                             |
|                                    | 40 Hypertension                                                                                              | 401.x-405.x                                                                                                                                                                                                                                                                              | C03AA, C03AB, C03AH, C03AX01, C02CA04, C03BA02, C03BA03, C03BA04, C03BA05, C03BA07, C03BA08, C03BA09, C03BA10, C03BA11, C03DB01, C03DB02, C03EA, C09BA02, C09BA03, C09BA04, C09BA05, C09BA06, C09BA07, C09BA08, C09BA09, C09BB, C09DB, C09DA01, C09DA02, C09DA03, C09DA04, C09DA06, C09DA07, C09DA08, C02AB01, C02AB02, C02AC01, C02AC02, C02AC04, C02AC05, C02DB02, C02DB03, C02DB04, C02DC01, C02DD01, C02DG01, C02KA01, C02KB01, C02KC01, C02KD01, C02KX01, C09XA B01AB, B01AX01, B01AD10, B01AD12, C04AD03, B01AC05 B01AA, B01AE, B01AF |
|                                    | 41 Coronary and peripheral vascular disease                                                                  |                                                                                                                                                                                                                                                                                          |                                                                                                                                                                                                                                                                                                                                                                                                                                                                                                                                             |
|                                    | 42 Oral anticoagulant agents                                                                                 |                                                                                                                                                                                                                                                                                          |                                                                                                                                                                                                                                                                                                                                                                                                                                                                                                                                             |
|                                    | 43 Other diseases of the circulatory system                                                                  | 390.x-392.x, 393, 397.9, 398.90, 398.99, 411.8x, 412.x-417x, 420.x-423.x, 424.99, 425.x, 426.0, 426.12, 426.54, 426.9, 427.1, 427.32, 427.4x, 427.5, 427.61, 427.69, 427.8x, 429.x, 441.0x, 441.1, 441.3, 441.5, 441.6, 442.x, 443.0, 444.x-446.x, 447.0, 447.2-447.9, 448.x 451.x-459.x |                                                                                                                                                                                                                                                                                                                                                                                                                                                                                                                                             |
| Diseases of the respiratory system | 44 Chronic Obstructive Pulmonary Disease, Asthma, Chronic respiratory disease only tracked from drug therapy | 490-492.x, 493.x, 494.x, 496                                                                                                                                                                                                                                                             | R03AA, R03AB, R03AC, R03DA, R03DB, R03DA20, R01AC01, R03BC01, R01AC51, S01GX01, S01GX51, R03BA                                                                                                                                                                                                                                                                                                                                                                                                                                              |

|                                                              |    |                                                                                                                                            |                                                                                       |                                                                                                                                                                                             |
|--------------------------------------------------------------|----|--------------------------------------------------------------------------------------------------------------------------------------------|---------------------------------------------------------------------------------------|---------------------------------------------------------------------------------------------------------------------------------------------------------------------------------------------|
|                                                              | 45 | Acute respiratory infections                                                                                                               | 460-466.x                                                                             |                                                                                                                                                                                             |
|                                                              | 46 | Cystic Fibrosis                                                                                                                            | 277.0                                                                                 | R05CB, R05FB01, R05FA01, A09AA02, R07AX02, R07AX30, R07AX31                                                                                                                                 |
|                                                              | 47 | Other diseases of the respiratory system                                                                                                   | 470.x-478.x, 480.x-487.x, 495.x, 500.x-508.x, 510.x-519.x                             |                                                                                                                                                                                             |
| Diseases of the digestive system                             | 48 | Liver cirrhosis and other liver chronic diseases                                                                                           | 571.x, 573.x                                                                          | J05AP08, J05AP09, J05AP51, J05AP53, J05AP54, J05AP55, J05AP56, J05AP57, B05AA01 A07EC01, A07EC02, A07EC03, A07EC04                                                                          |
|                                                              | 49 | Inflammatory bowel diseases (Ulcerative colitis and Chron's disease)                                                                       | 555.x-556.x                                                                           |                                                                                                                                                                                             |
|                                                              | 50 | Chronic and acute pancreatitis                                                                                                             | 577.0-577.1                                                                           |                                                                                                                                                                                             |
|                                                              | 51 | Other diseases of the digestive system                                                                                                     | 520.x-553.x, 557.x-570, 572.x, 574.x-576.x, 577.2-577.9, 578.x, 579.x                 |                                                                                                                                                                                             |
| Diseases of the genitourinary system                         | 52 | Chronic kidney disease                                                                                                                     | 585, V45.1, V56.x, V03AE                                                              |                                                                                                                                                                                             |
|                                                              | 53 | Other kidney disorders                                                                                                                     | 580.x-584.x, 586, 587, 588.x-589.x                                                    |                                                                                                                                                                                             |
|                                                              | 54 | Other diseases of the genitourinary system                                                                                                 | 590.x-608.x, 610.x, 611.x, 614.x-629.x                                                |                                                                                                                                                                                             |
| Diseases of the skin and subcutaneous tissues                | 55 | Diseases of the skin and subcutaneous tissues, including No rheumatoid psoriasis                                                           | 680.x-686.x, 690.x-695.x, 696.0, 696.2-696.5, 696.8, 697.x, 698.x, 700.x-709.x, 696.1 | D05BB01, D05BB02, D05AX                                                                                                                                                                     |
| Diseases of the musculoskeletal system and connective tissue | 56 | Autoimmune disease (Rheumatoid arthritis, Rheumatoid psoriasis, Anchylosing spondylitis, Systemic sclerosis, Systemic lupus erythematosus) | 714.0, 696.0, 720.0, 710.1x, 710.0x                                                   |                                                                                                                                                                                             |
|                                                              | 57 | Other diseases of the musculoskeletal system and connective tissue                                                                         | 710.2-710.9, 711.x-713.x, 714.1x, 714.9x, 715.x-719.x, 720.1x-720.9x, 721.x-739.x     |                                                                                                                                                                                             |
| Symptoms, signs and ill-defined conditions                   | 58 | Symptoms, signs and ill-defined conditions                                                                                                 | 780-799                                                                               |                                                                                                                                                                                             |
| Other conditions                                             | 59 | Transplantation                                                                                                                            | V42                                                                                   | L04AA01, L04AA02, L04AA03, L04AA04, L04AA05, L04AA06, L04AA08, L04AA09, L04AA10, L04AA11, L04AA12, L04AA14, L04AA15, L04AA16, L04AA17, L04AA18, L04AA19, L04AA21, L04AD01, L04AD02, L04AX01 |

|    |                                                                         |              |                                                                              |
|----|-------------------------------------------------------------------------|--------------|------------------------------------------------------------------------------|
| 60 | Chronic pain                                                            | 338.2, 338.4 | N02AA01, N02AG01, N02AE01,<br>N02AB03, N02AA05, N02AA55,<br>N02AA03, N02AX06 |
| 61 | Corticosteroids                                                         |              | H02                                                                          |
| 62 | Hormone therapy (oral contraceptives or replacement<br>hormone therapy) |              | G03AA, G03AB, G02BB01,<br>G03HB01, G03CA                                     |



**Table S2.** ICD-9 codes used for tracking venous thromboembolic outcome events.

| ICD-9 codes | Diagnosis                                            |
|-------------|------------------------------------------------------|
| 415.1       | Pulmonary embolism and infarction                    |
| 437.6       | Nonpyogenic thrombosis of intracranial venous system |
| 451         | Deep vein thrombosis                                 |
| 452         | Portal vein obstruction                              |
| 453.0       | Budd-Chiari syndrome (hepatic vein thrombosis)       |
| 453.1       | Thrombophlebitis migrans                             |
| 453.2       | Embolism of Vena Cava                                |
| 453.3       | Embolism and thrombosis in renal vein                |
| 557.1       | Mesenteric vein thrombosis                           |

**Table S3.** Benefit profile according with vaccine type, gender and age category obtained by changing the time-window length after vaccine inoculation assumed of not involving vaccination protection because immunity is gradually building. Time-windows of 7 and 21 days were considered for this secondary analysis alternative to 14 days of the main analysis.

**Oxford-AstraZeneca, women, 7 days**

| Age category (years) | Exposure to vaccine benefits (first dose) |         |                    | Unexposure to vaccine benefits |         |                    | Incidence rate ratio (95% CI) <sup>(a)</sup> |                  | Number needed to treat (95% CI) <sup>(b)</sup> |
|----------------------|-------------------------------------------|---------|--------------------|--------------------------------|---------|--------------------|----------------------------------------------|------------------|------------------------------------------------|
|                      | # events                                  | # PM    | IR (per 10,000 PM) | # events                       | # PM    | IR (per 10,000 PM) | Unadjusted                                   | Adjusted         |                                                |
| < 50                 | 15                                        | 220,308 | 0.68               | 103                            | 277,919 | 3.71               | 0.18 (0.11-0.32)                             | 0.19 (0.11-0.32) | 3,331 (402-4,535)                              |
| 50-59                | 13                                        | 108,298 | 1.20               | 73                             | 136,288 | 5.36               | 0.22 (0.13-0.41)                             | 0.23 (0.13-0.42) | 2,406 (293-3,622)                              |
| 60-69                | 24                                        | 67,347  | 3.56               | 88                             | 102,880 | 8.55               | 0.42 (0.27-0.67)                             | 0.48 (0.31-0.77) | 2,004 (478-3,792)                              |
| 70-79                | 22                                        | 85,486  | 2.57               | 178                            | 163,370 | 10.90              | 0.24 (0.16-0.39)                             | 0.28 (0.18-0.43) | 1,202 (333-1,578)                              |
| ≥ 80                 | 3                                         | 2,563   | 11.70              | 6                              | 3,806   | 15.77              | 0.74 (0.19-2.97)                             | 0.86 (0.20-3.74) | -                                              |
| Total                | 77                                        | 484,003 | 1.59               | 448                            | 684,263 | 6.55               |                                              |                  |                                                |

**Oxford-AstraZeneca, women, 21 days**

| Age category (years) | Exposure to vaccine benefits (first dose) |         |                    | Unexposure to vaccine benefits |         |                    | Incidence rate ratio (95% CI) <sup>(a)</sup> |                  | Number needed to treat (95% CI) <sup>(b)</sup> |
|----------------------|-------------------------------------------|---------|--------------------|--------------------------------|---------|--------------------|----------------------------------------------|------------------|------------------------------------------------|
|                      | # events                                  | # PM    | IR (per 10,000 PM) | # events                       | # PM    | IR (per 10,000 PM) | Unadjusted                                   | Adjusted         |                                                |
| < 50                 | 6                                         | 161,151 | 0.37               | 113                            | 323,010 | 3.50               | 0.11 (0.05-0.24)                             | 0.11 (0.05-0.25) | 3,212 (170-4,165)                              |
| 50-59                | 5                                         | 80,337  | 0.62               | 81                             | 160,759 | 5.04               | 0.12 (0.05-0.31)                             | 0.13 (0.05-0.32) | 2,264 (121-3,140)                              |
| 60-69                | 8                                         | 39,843  | 2.01               | 104                            | 130,068 | 8.00               | 0.25 (0.12-0.53)                             | 0.29 (0.14-0.59) | 1,670 (173-2,602)                              |
| 70-79                | 4                                         | 39,459  | 1.01               | 196                            | 209,391 | 9.36               | 0.11 (0.04-0.30)                             | 0.12 (0.05-0.34) | 1,198 (73-1,499)                               |
| ≥ 80                 | 1                                         | 1,474   | 6.78               | 8                              | 4,897   | 16.34              | 0.42 (0.05-3.32)                             | 0.51 (0.06-4.23) | -                                              |
| Total                | 24                                        | 322,264 | 0.74               | 502                            | 828,125 | 6.06               |                                              |                  |                                                |

**Oxford-AstraZeneca, men, 7 days**

| Age category (years) | Exposure to vaccine benefits (first dose) |         |                    | Unexposure to vaccine benefits |         |                    | Incidence rate ratio (95% CI) <sup>(a)</sup> |                  | Number needed to treat (95% CI) <sup>(b)</sup> |
|----------------------|-------------------------------------------|---------|--------------------|--------------------------------|---------|--------------------|----------------------------------------------|------------------|------------------------------------------------|
|                      | # events                                  | # PM    | IR (per 10,000 PM) | # events                       | # PM    | IR (per 10,000 PM) | Unadjusted                                   | Adjusted         |                                                |
| < 50                 | 19                                        | 118,340 | 1.61               | 66                             | 148,358 | 4.45               | 0.36 (0.22-0.62)                             | 0.38 (0.22-0.63) | 3,517 (516-6,498)                              |
| 50-59                | 16                                        | 55,041  | 2.91               | 82                             | 69,090  | 11.87              | 0.24 (0.14-0.42)                             | 0.25 (0.15-0.43) | 1,116 (222-1,662)                              |
| 60-69                | 18                                        | 49,870  | 3.61               | 103                            | 78,297  | 13.15              | 0.27 (0.17-0.46)                             | 0.29 (0.18-0.49) | 1,048 (241-1,543)                              |
| 70-79                | 64                                        | 67,048  | 9.55               | 254                            | 129,963 | 19.54              | 0.49 (0.40-0.69)                             | 0.57 (0.43-0.75) | 1,000 (537-1,536)                              |
| ≥ 80                 | 4                                         | 1,635   | 24.47              | 8                              | 2,415   | 33.13              | 0.74 (0.22-2.45)                             | 0.91 (0.25-3.36) | -                                              |
| Total                | 121                                       | 291,934 | 4.14               | 513                            | 428,123 | 11.98              | 0.36 (0.22-0.62)                             | 0.38 (0.22-0.63) |                                                |

**Oxford-AstraZeneca, men, 21 days**

| Age category (years) | Exposure to vaccine benefits (first dose) |         |                    | Unexposure to vaccine benefits |         |                    | Incidence rate ratio (95% CI) <sup>(a)</sup> |                  | Number needed to treat (95% CI) <sup>(b)</sup> |
|----------------------|-------------------------------------------|---------|--------------------|--------------------------------|---------|--------------------|----------------------------------------------|------------------|------------------------------------------------|
|                      | # events                                  | # PM    | IR (per 10,000 PM) | # events                       | # PM    | IR (per 10,000 PM) | Unadjusted                                   | Adjusted         |                                                |
| < 50                 | 4                                         | 83,403  | 0.48               | 82                             | 169,773 | 4.83               | 0.10 (0.04-0.28)                             | 0.10 (0.04-0.28) | 2,299 (94-3,122)                               |
| 50-59                | 3                                         | 39,834  | 0.75               | 95                             | 80,064  | 11.87              | 0.06 (0.01-0.15)                             | 0.06 (0.02-0.20) | 900 (41-1,165)                                 |
| 60-69                | 3                                         | 28,568  | 1.05               | 118                            | 99,255  | 11.89              | 0.09 (0.03-0.28)                             | 0.09 (0.03-0.30) | 923 (45-1,193)                                 |
| 70-79                | 2                                         | 30,652  | 0.65               | 316                            | 166,360 | 19.00              | 0.03 (0.02-0.20)                             | 0.04 (0.01-0.15) | 545 (26-624)                                   |
| ≥ 80                 | 1                                         | 945     | 10.58              | 11                             | 3,105   | 35.43              | 0.30 (0.04-2.31)                             | 0.34 (0.04-2.71) | -                                              |
| Total                | 13                                        | 183,401 | 0.71               | 622                            | 518,556 | 12.00              |                                              |                  |                                                |

**Pfizer/Moderna, women, 7 days**

| Age category (years) | Exposure to vaccine benefits (first dose) |         |                    | Unexposure to vaccine benefits |           |                    | Incidence rate ratio (95% CI) <sup>(a)</sup> |                  | Number needed to treat (95% CI) <sup>(b)</sup> |
|----------------------|-------------------------------------------|---------|--------------------|--------------------------------|-----------|--------------------|----------------------------------------------|------------------|------------------------------------------------|
|                      | # events                                  | # PM    | IR (per 10,000 PM) | # events                       | # PM      | IR (per 10,000 PM) | Unadjusted                                   | Adjusted         |                                                |
| < 50                 | 28                                        | 107,018 | 2.62               | 179                            | 458,690   | 3.90               | 0.67 (0.45-1.00)                             | 0.58 (0.39-0.88) | 6,101 (3,695-17,494)                           |
| 50-59                | 24                                        | 74,243  | 3.23               | 161                            | 296,328   | 5.43               | 0.59 (0.39-0.91)                             | 0.51 (0.33-0.79) | 3,756 (2,425-8,333)                            |
| 60-69                | 22                                        | 60,101  | 3.66               | 164                            | 182,173   | 9.00               | 0.41 (0.27-0.65)                             | 0.38 (0.24-0.59) | 1,792 (1,315-2,809)                            |
| 70-79                | 54                                        | 55,991  | 9.64               | 198                            | 142,035   | 13.94              | 0.69 (0.55-1.01)                             | 0.65 (0.48-0.88) | 2,050 (1,244-5,818)                            |
| ≥ 80                 | 476                                       | 163,875 | 29.05              | 2007                           | 517,441   | 38.79              | 0.75 (0.71-0.86)                             | 0.77 (0.69-0.85) | 1,121 (829-1,731)                              |
| Total                | 604                                       | 461,227 | 13.10              | 2709                           | 1,596,666 | 16.97              |                                              |                  |                                                |

**Pfizer/Moderna, women, 21 days**

| Age category (years) | Exposure to vaccine benefits (first dose) |         |                    | Unexposure to vaccine benefits |           |                    | Incidence rate ratio (95% CI) <sup>(a)</sup> |                  | Number needed to treat (95% CI) <sup>(b)</sup> |
|----------------------|-------------------------------------------|---------|--------------------|--------------------------------|-----------|--------------------|----------------------------------------------|------------------|------------------------------------------------|
|                      | # events                                  | # PM    | IR (per 10,000 PM) | # events                       | # PM      | IR (per 10,000 PM) | Unadjusted                                   | Adjusted         |                                                |
| < 50                 | 5                                         | 86,941  | 0.58               | 206                            | 515,798   | 3.99               | 0.13 (0.06-0.35)                             | 0.13 (0.05-0.32) | 2,878 (2,381-3,638)                            |
| 50-59                | 0                                         | 57,036  | 0.00               | 187                            | 336,276   | 5.56               | -                                            | -                | -                                              |
| 60-69                | 1                                         | 34,242  | 0.29               | 186                            | 216,700   | 8.58               | 0.03 (0.00-0.25)                             | 0.03 (0.00-0.23) | 1,206 (1,036-1,443)                            |
| 70-79                | 7                                         | 24,864  | 2.82               | 248                            | 172,794   | 14.35              | 0.19 (0.10-0.44)                             | 0.19 (0.09-0.39) | 860 (697-1,123)                                |
| ≥ 80                 | 91                                        | 120,342 | 7.56               | 2413                           | 622,229   | 38.78              | 0.19 (0.16-0.25)                             | 0.19 (0.16-0.25) | 320 (299-345)                                  |
| Total                | 104                                       | 323,425 | 3.26               | 3240                           | 1,863,797 | 17.39              |                                              |                  |                                                |

**Pfizer/Moderna, men, 7 days**

| Age category (years) | Exposure to vaccine benefits (first dose) |         |                    | Unexposure to vaccine benefits |           |                    | Incidence rate ratio (95% CI) <sup>(a)</sup> |                  | Number needed to treat (95% CI) <sup>(b)</sup> |
|----------------------|-------------------------------------------|---------|--------------------|--------------------------------|-----------|--------------------|----------------------------------------------|------------------|------------------------------------------------|
|                      | # events                                  | # PM    | IR (per 10,000 PM) | # events                       | # PM      | IR (per 10,000 PM) | Unadjusted                                   | Adjusted         |                                                |
| < 50                 | 19                                        | 66,697  | 2.85               | 86                             | 252,711   | 3.40               | 0.84 (0.53-1.45)                             | 0.70 (0.42-1.18) | -                                              |
| 50-59                | 25                                        | 47,873  | 5.22               | 148                            | 157,073   | 9.42               | 0.55 (0.38-0.88)                             | 0.46 (0.30-0.72) | 1,965 (1,335-3,727)                            |
| 60-69                | 69                                        | 56,434  | 12.23              | 265                            | 168,445   | 15.73              | 0.78 (0.60-1.03)                             | 0.68 (0.52-0.89) | 1,986 (1,200-5,756)                            |
| 70-79                | 86                                        | 52,322  | 16.44              | 340                            | 140,313   | 24.23              | 0.68 (0.56-0.91)                             | 0.64 (0.50-0.81) | 1,146 (771-2,233)                              |
| ≥ 80                 | 375                                       | 89,637  | 41.84              | 1641                           | 289,685   | 56.65              | 0.74 (0.69-0.87)                             | 0.75 (0.67-0.84) | 706 (520-1,100)                                |
| Total                | 574                                       | 312,963 | 18.34              | 2480                           | 1,008,227 | 24.60              |                                              |                  |                                                |

**Pfizer/Moderna, men, 21 days**

| Age category (years) | Exposure to vaccine benefits (first dose) |         |                    | Unexposure to vaccine benefits |           |                    | Incidence rate ratio (95% CI) <sup>(a)</sup> |                  | Number needed to treat (95% CI) <sup>(b)</sup> |
|----------------------|-------------------------------------------|---------|--------------------|--------------------------------|-----------|--------------------|----------------------------------------------|------------------|------------------------------------------------|
|                      | # events                                  | # PM    | IR (per 10,000 PM) | # events                       | # PM      | IR (per 10,000 PM) | Unadjusted                                   | Adjusted         |                                                |
| < 50                 | 6                                         | 49,231  | 1.22               | 100                            | 286,251   | 3.49               | 0.35 (0.16-0.83)                             | 0.30 (0.13-0.69) | 4,396 (2,885-9,232)                            |
| 50-59                | 4                                         | 32,164  | 1.24               | 171                            | 181,239   | 9.44               | 0.13 (0.05-0.37)                             | 0.11 (0.04-0.31) | 1,221 (994-1,581)                              |
| 60-69                | 5                                         | 31,520  | 1.59               | 332                            | 200,617   | 16.55              | 0.10 (0.04-0.23)                             | 0.09 (0.04-0.21) | 668 (581-787)                                  |
| 70-79                | 11                                        | 24,533  | 4.48               | 418                            | 170,165   | 24.56              | 0.18 (0.10-0.35)                             | 0.18 (0.10-0.32) | 498 (423-605)                                  |
| ≥ 80                 | 55                                        | 65,238  | 8.43               | 1980                           | 352,287   | 56.20              | 0.15 (0.12-0.20)                             | 0.15 (0.12-0.20) | 209 (196-225)                                  |
| Total                | 81                                        | 202,687 | 4.00               | 3001                           | 1,190,559 | 25.21              |                                              |                  |                                                |

**Table S4.** Harm profile according with vaccine type, gender and age category obtained by changing the time-window length at risk of developing venous thromboembolism. Time-windows of 21 and 35 days were considered for this secondary analysis alternative to 28 days of the main analysis.

**Oxford-AstraZeneca, women, 21 days**

| Age category (years) | Exposure to vaccine benefits (first dose) |         |                    | Unexposure to vaccine benefits |           |                    | Incidence rate ratio (95% CI) <sup>(a)</sup> |                  | Number needed to harm (95% CI) <sup>(b)</sup> |
|----------------------|-------------------------------------------|---------|--------------------|--------------------------------|-----------|--------------------|----------------------------------------------|------------------|-----------------------------------------------|
|                      | # events                                  | # PM    | IR (per 10,000 PM) | # events                       | # PM      | IR (per 10,000 PM) | Unadjusted                                   | Adjusted         |                                               |
| < 50                 | 6                                         | 75,027  | 0.80               | 22                             | 750,270   | 0.29               | 2.73 (1.11-6.73)                             | 2.90 (1.15-7.31) | 17,949 (8,142-87,716)                         |
| 50-59                | 4                                         | 38,835  | 1.03               | 18                             | 388,336   | 0.46               | 2.22 (0.75-6.57)                             | 2.48 (0.83-7.38) | -                                             |
| 60-69                | 3                                         | 44,947  | 0.67               | 43                             | 449,395   | 0.96               | 0.70 (0.22-2.25)                             | 0.73 (0.22-2.37) | -                                             |
| 70-79                | 9                                         | 84,832  | 1.06               | 263                            | 847,777   | 3.10               | 0.34 (0.15-0.61)                             | 0.32 (0.16-0.64) | -                                             |
| ≥ 80                 | 0                                         | 1,703   | 0.00               | 9                              | 16,950    | 5.31               | -                                            | -                | -                                             |
| Total                | 22                                        | 245,343 | 0.90               | 355                            | 2,452,728 | 1.45               |                                              |                  |                                               |

**Oxford-AstraZeneca, women, 35 days**

| Age category (years) | Exposure to vaccine benefits (first dose) |         |                    | Unexposure to vaccine benefits |           |                    | Incidence rate ratio (95% CI) <sup>(a)</sup> |                  | Number needed to harm (95% CI) <sup>(b)</sup> |
|----------------------|-------------------------------------------|---------|--------------------|--------------------------------|-----------|--------------------|----------------------------------------------|------------------|-----------------------------------------------|
|                      | # events                                  | # PM    | IR (per 10,000 PM) | # events                       | # PM      | IR (per 10,000 PM) | Unadjusted                                   | Adjusted         |                                               |
| < 50                 | 7                                         | 123,838 | 0.57               | 35                             | 1,238,389 | 0.28               | 2.00 (0.89-4.50)                             | 2.12 (0.93-4.85) | -                                             |
| 50-59                | 4                                         | 63,700  | 0.63               | 38                             | 636,955   | 0.60               | 1.05 (0.38-2.95)                             | 1.20 (0.43-3.38) | -                                             |
| 60-69                | 5                                         | 65,352  | 0.77               | 64                             | 653,353   | 0.98               | 0.78 (0.31-1.94)                             | 0.87 (0.35-2.17) | -                                             |
| 70-79                | 13                                        | 112,687 | 1.15               | 312                            | 1,125,687 | 2.77               | 0.42 (0.22-0.68)                             | 0.40 (0.23-0.72) | -                                             |
| ≥ 80                 | 0                                         | 2,631   | 0.00               | 17                             | 26,134    | 6.50               | -                                            | -                | -                                             |
| Total                | 29                                        | 368,208 | 0.79               | 466                            | 3,680,518 | 1.27               |                                              |                  |                                               |

**Oxford-AstraZeneca, men, 21 days**

| Age category (years) | Exposure to vaccine benefits (first dose) |         |                    | Unexposure to vaccine benefits |           |                    | Incidence rate ratio (95% CI) <sup>(a)</sup> |                   | Number needed to harm (95% CI) <sup>(b)</sup> |
|----------------------|-------------------------------------------|---------|--------------------|--------------------------------|-----------|--------------------|----------------------------------------------|-------------------|-----------------------------------------------|
|                      | # events                                  | # PM    | IR (per 10,000 PM) | # events                       | # PM      | IR (per 10,000 PM) | Unadjusted                                   | Adjusted          |                                               |
| < 50                 | 1                                         | 38,108  | 0.26               | 29                             | 381,067   | 0.76               | 0.34 (0.05-2.53)                             | 0.34 (0.05-2.49)  | -                                             |
| 50-59                | 2                                         | 18,535  | 1.08               | 24                             | 185,340   | 1.29               | 0.83 (0.20-3.53)                             | 0.86 (0.20-3.66)  | -                                             |
| 60-69                | 8                                         | 35,248  | 2.27               | 81                             | 352,399   | 2.30               | 0.99 (0.48-2.04)                             | 0.98 (0.47-2.04)  | -                                             |
| 70-79                | 11                                        | 67,952  | 1.62               | 289                            | 678,568   | 4.26               | 0.38 (0.21-0.69)                             | 0.36 (0.20-0.67)  | -                                             |
| ≥ 80                 | 1                                         | 1,067   | 9.37               | 9                              | 10,599    | 8.49               | 1.10 (0.14-8.71)                             | 1.25 (0.15-10.65) | -                                             |
| Total                | 23                                        | 160,910 | 1.43               | 432                            | 1,607,972 | 2.69               |                                              |                   |                                               |

**Oxford-AstraZeneca, men, 35 days**

| Age category (years) | Exposure to vaccine benefits (first dose) |         |                    | Unexposure to vaccine benefits |           |                    | Incidence rate ratio (95% CI) <sup>(a)</sup> |                  | Number needed to harm (95% CI) <sup>(b)</sup> |
|----------------------|-------------------------------------------|---------|--------------------|--------------------------------|-----------|--------------------|----------------------------------------------|------------------|-----------------------------------------------|
|                      | # events                                  | # PM    | IR (per 10,000 PM) | # events                       | # PM      | IR (per 10,000 PM) | Unadjusted                                   | Adjusted         |                                               |
| < 50                 | 1                                         | 63,129  | 0.16               | 38                             | 631,260   | 0.60               | 0.26 (0.04-1.92)                             | 0.25 (0.03-1.80) | -                                             |
| 50-59                | 3                                         | 30,563  | 0.98               | 30                             | 305,612   | 0.98               | 1.00 (0.31-3.28)                             | 1.03 (0.31-3.40) | -                                             |
| 60-69                | 11                                        | 50,509  | 2.18               | 112                            | 504,904   | 2.22               | 0.98 (0.53-1.82)                             | 0.99 (0.53-1.86) | -                                             |
| 70-79                | 17                                        | 89,529  | 1.90               | 362                            | 893,234   | 4.05               | 0.47 (0.29-0.76)                             | 0.45 (0.27-0.73) | -                                             |
| ≥ 80                 | 1                                         | 1,655   | 6.04               | 10                             | 16,393    | 6.10               | 0.99 (0.13-7.74)                             | 1.18 (0.14-9.90) | -                                             |
| Total                | 33                                        | 235,386 | 1.40               | 552                            | 2,351,403 | 2.35               |                                              |                  |                                               |

**Pfizer/Moderna, women, 21 days**

| Age category (years) | Exposure to vaccine benefits (first dose) |         |                    | Unexposure to vaccine benefits |           |                    | Incidence rate ratio (95% CI) <sup>(a)</sup> |                  | Number needed to harm (95% CI) <sup>(b)</sup> |
|----------------------|-------------------------------------------|---------|--------------------|--------------------------------|-----------|--------------------|----------------------------------------------|------------------|-----------------------------------------------|
|                      | # events                                  | # PM    | IR (per 10,000 PM) | # events                       | # PM      | IR (per 10,000 PM) | Unadjusted                                   | Adjusted         |                                               |
| < 50                 | 9                                         | 99,037  | 0.91               | 27                             | 986,336   | 0.27               | 3.32 (1.56-7.06)                             | 2.09 (0.94-4.64) | -                                             |
| 50-59                | 0                                         | 69,543  | 0.00               | 24                             | 692,689   | 0.35               | -                                            | -                | -                                             |
| 60-69                | 9                                         | 67,897  | 1.33               | 75                             | 676,581   | 1.11               | 1.20 (0.60-2.39)                             | 0.86 (0.43-1.74) | -                                             |
| 70-79                | 15                                        | 69,950  | 2.14               | 242                            | 697,201   | 3.47               | 0.62 (0.34-0.99)                             | 0.47 (0.27-0.80) | -                                             |
| ≥ 80                 | 75                                        | 215,753 | 3.48               | 1,114                          | 2,099,026 | 5.31               | 0.65 (0.52-0.83)                             | 0.66 (0.52-0.83) | -                                             |
| Total                | 108                                       | 522,180 | 2.07               | 1,482                          | 5,151,833 | 2.88               |                                              |                  |                                               |

**Pfizer/Moderna, women, 35 days**

| Age category (years) | Exposure to vaccine benefits (first dose) |         |                    | Unexposure to vaccine benefits |           |                    | Incidence rate ratio (95% CI) <sup>(a)</sup> |                  | Number needed to harm (95% CI) <sup>(b)</sup> |
|----------------------|-------------------------------------------|---------|--------------------|--------------------------------|-----------|--------------------|----------------------------------------------|------------------|-----------------------------------------------|
|                      | # events                                  | # PM    | IR (per 10,000 PM) | # events                       | # PM      | IR (per 10,000 PM) | Unadjusted                                   | Adjusted         |                                               |
| < 50                 | 11                                        | 161,757 | 0.68               | 48                             | 1,610,972 | 0.30               | 2.28 (1.19-4.39)                             | 1.39 (0.70-2.78) | -                                             |
| 50-59                | 2                                         | 111,832 | 0.18               | 48                             | 1,113,894 | 0.43               | 0.42 (0.10-1.71)                             | 0.29 (0.07-1.21) | -                                             |
| 60-69                | 11                                        | 98,126  | 1.12               | 102                            | 977,919   | 1.04               | 1.07 (0.58-2.00)                             | 0.79 (0.42-1.48) | -                                             |
| 70-79                | 19                                        | 98,382  | 1.93               | 293                            | 980,748   | 2.99               | 0.65 (0.38-0.99)                             | 0.51 (0.31-0.82) | -                                             |
| ≥ 80                 | 113                                       | 313,134 | 3.61               | 1,602                          | 3,036,236 | 5.28               | 0.68 (0.57-0.83)                             | 0.68 (0.56-0.83) | -                                             |
| Total                | 156                                       | 783,231 | 1.99               | 2,093                          | 7,719,769 | 2.71               |                                              |                  |                                               |



**Pfizer/Moderna, men, 21 days**

| Age category (years) | Exposure to vaccine benefits (first dose) |         |                    | Unexposure to vaccine benefits |           |                    | Incidence rate ratio (95% CI) <sup>(a)</sup> |                  | Number needed to harm (95% CI) <sup>(b)</sup> |
|----------------------|-------------------------------------------|---------|--------------------|--------------------------------|-----------|--------------------|----------------------------------------------|------------------|-----------------------------------------------|
|                      | # events                                  | # PM    | IR (per 10,000 PM) | # events                       | # PM      | IR (per 10,000 PM) | Unadjusted                                   | Adjusted         |                                               |
| < 50                 | 1                                         | 61,000  | 0.16               | 15                             | 607,180   | 0.25               | 0.66 (0.09-5.02)                             | 0.69 (0.09-5.24) | -                                             |
| 50-59                | 11                                        | 44,220  | 2.49               | 33                             | 439,986   | 0.75               | 3.32 (1.68-6.56)                             | 2.32 (0.97-5.53) | -                                             |
| 60-69                | 19                                        | 64,393  | 2.95               | 152                            | 641,386   | 2.37               | 1.25 (0.77-2.01)                             | 0.87 (0.53-1.42) | -                                             |
| 70-79                | 20                                        | 66,672  | 3.00               | 274                            | 664,420   | 4.12               | 0.73 (0.46-1.15)                             | 0.64 (0.40-1.01) | -                                             |
| ≥ 80                 | 45                                        | 129,497 | 3.48               | 850                            | 1,252,558 | 6.79               | 0.51 (0.37-0.68)                             | 0.50 (0.37-0.68) | -                                             |
| Total                | 96                                        | 365,781 | 2.62               | 1,324                          | 3,605,530 | 3.67               |                                              |                  |                                               |

**Pfizer/Moderna, men, 35 days**

| Age category (years) | Exposure to vaccine benefits (first dose) |         |                    | Unexposure to vaccine benefits |           |                    | Incidence rate ratio (95% CI) <sup>(a)</sup> |                  | Number needed to harm (95% CI) <sup>(b)</sup> |
|----------------------|-------------------------------------------|---------|--------------------|--------------------------------|-----------|--------------------|----------------------------------------------|------------------|-----------------------------------------------|
|                      | # events                                  | # PM    | IR (per 10,000 PM) | # events                       | # PM      | IR (per 10,000 PM) | Unadjusted                                   | Adjusted         |                                               |
| < 50                 | 3                                         | 99,109  | 0.30               | 24                             | 986,448   | 0.24               | 1.24 (0.37-4.13)                             | 0.73 (0.21-2.61) | -                                             |
| 50-59                | 12                                        | 70,288  | 1.71               | 50                             | 699,322   | 0.72               | 2.39 (1.27-4.48)                             | 1.59 (0.80-3.16) | -                                             |
| 60-69                | 26                                        | 92,779  | 2.80               | 196                            | 924,262   | 2.12               | 1.32 (0.88-1.99)                             | 0.95 (0.63-1.45) | -                                             |
| 70-79                | 23                                        | 93,631  | 2.46               | 357                            | 933,047   | 3.83               | 0.64 (0.42-0.98)                             | 0.57 (0.37-0.87) | -                                             |
| ≥ 80                 | 67                                        | 183,442 | 3.65               | 1,148                          | 1,763,492 | 6.51               | 0.56 (0.43-0.71)                             | 0.55 (0.43-0.70) | -                                             |
| Total                | 131                                       | 539,249 | 2.43               | 1,775                          | 5,306,570 | 3.34               |                                              |                  |                                               |

**Table S5.** Benefit –harm profiles according with vaccine type, gender and age category obtained by propensity score adjustment.

**Oxford-AstraZeneca, Women**

| Age category (years) | Exposure to vaccine benefits (first dose) |         |                    | Unexposure to vaccine benefits |         |                    | Adjusted incidence rate ratio (95% CI) | Number needed to treat (95% CI) <sup>(b)</sup> |
|----------------------|-------------------------------------------|---------|--------------------|--------------------------------|---------|--------------------|----------------------------------------|------------------------------------------------|
|                      | # events                                  | # PM    | IR (per 10,000 PM) | # events                       | # PM    | IR (per 10,000 PM) |                                        |                                                |
| < 50                 | 7                                         | 198,035 | 0.35               | 111                            | 302,575 | 3.67               | 0.10 (0.05 to 0.22)                    | 3,029 (191-3,893)                              |
| 50-59                | 8                                         | 95,952  | 0.83               | 78                             | 149,102 | 5.23               | 0.16 (0.08 to 0.34)                    | 2,274 (180-3,226)                              |
| 60-69                | 12                                        | 52,563  | 2.28               | 100                            | 117,698 | 8.50               | 0.30 (0.16 to 0.55)                    | 1,609 (234-2,463)                              |
| 70-79                | 10                                        | 58,529  | 1.71               | 190                            | 190,324 | 9.98               | 0.21 (0.11 to 0.39)                    | 1,209 (184-1,555)                              |
| ≥ 80                 | 1                                         | 1,997   | 5.01               | 8                              | 4,373   | 18.29              | 0.27 (0.03 to 2.18)                    | -                                              |
| Total                | 38                                        | 407,077 | 0.93               | 487                            | 764,072 | 6.37               |                                        |                                                |

| Age category (years) | Exposure to vaccine harms (first dose) |         |                    | Unexposure to vaccine harms |           |                    | Adjusted incidence rate ratio (95% CI) | Number needed to harm (95% CI) <sup>(b)</sup> |
|----------------------|----------------------------------------|---------|--------------------|-----------------------------|-----------|--------------------|----------------------------------------|-----------------------------------------------|
|                      | # events                               | # PM    | IR (per 10,000 PM) | # events                    | # PM      | IR (per 10,000 PM) |                                        |                                               |
| < 50                 | 7                                      | 99,556  | 0.70               | 30                          | 995,563   | 0.30               | 2.74 (1.19-6.28)                       | 19,072 (9,099-198,691)                        |
| 50-59                | 4                                      | 51,391  | 0.78               | 28                          | 513,884   | 0.54               | 1.53 (0.54-4.39)                       | -                                             |
| 60-69                | 4                                      | 56,267  | 0.71               | 53                          | 562,560   | 0.94               | 0.82 (0.29-2.26)                       | -                                             |
| 70-79                | 12                                     | 100,237 | 1.20               | 293                         | 1,001,500 | 2.93               | 0.43 (0.24-0.79)                       | -                                             |
| ≥ 80                 | 0                                      | 2,191   | 0.00               | 12                          | 21,792    | 5.51               | -                                      | -                                             |
| Total                | 27                                     | 309,642 | 0.87               | 416                         | 3,095,299 | 1.34               |                                        |                                               |

### Oxford-AstraZeneca, Men

| Age category (years) | Exposure to vaccine benefits (first dose) |         |                    | Unexposure to vaccine benefits |         |                    | Adjusted incidence rate ratio (95% CI) | Number needed to treat (95% CI) <sup>(b)</sup> |
|----------------------|-------------------------------------------|---------|--------------------|--------------------------------|---------|--------------------|----------------------------------------|------------------------------------------------|
|                      | # events                                  | # PM    | IR (per 10,000 PM) | # events                       | # PM    | IR (per 10,000 PM) |                                        |                                                |
| < 50                 | 11                                        | 107,608 | 1.02               | 74                             | 160,921 | 4.60               | 0.21 (0.11 to 0.39)                    | 2,796 (255-4,210)                              |
| 50-59                | 8                                         | 49,469  | 1.62               | 90                             | 75,166  | 11.97              | 0.14 (0.07 to 0.28)                    | 966 (116-1,310)                                |
| 60-69                | 9                                         | 38,341  | 2.35               | 112                            | 89,850  | 12.47              | 0.20 (0.10 to 0.40)                    | 988 (133-1,366)                                |
| 70-79                | 22                                        | 45,579  | 4.83               | 296                            | 151,433 | 19.55              | 0.28 (0.18 to 0.44)                    | 679 (222-860)                                  |
| ≥ 80                 | 2                                         | 1,277   | 15.66              | 10                             | 2,772   | 36.08              | 0.44 (0.10 to 2.02)                    | -                                              |
| Total                | 52                                        | 242,274 | 2.15               | 582                            | 480,142 | 12.12              |                                        |                                                |

| Age category (years) | Exposure to vaccine harms (first dose) |         |                    | Unexposure to vaccine harms |           |                    | Adjusted incidence rate ratio (95% CI) | Number needed to harm (95% CI) <sup>(b)</sup> |
|----------------------|----------------------------------------|---------|--------------------|-----------------------------|-----------|--------------------|----------------------------------------|-----------------------------------------------|
|                      | # events                               | # PM    | IR (per 10,000 PM) | # events                    | # PM      | IR (per 10,000 PM) |                                        |                                               |
| < 50                 | 1                                      | 50,669  | 0.20               | 33                          | 506,677   | 0.65               | 0.33 (0.04-2.39)                       | -                                             |
| 50-59                | 3                                      | 24,608  | 1.22               | 28                          | 246,071   | 1.14               | 1.10 (0.33-3.62)                       | -                                             |
| 60-69                | 8                                      | 43,846  | 1.82               | 98                          | 438,323   | 2.26               | 0.90 (0.44-1.86)                       | -                                             |
| 70-79                | 14                                     | 79,934  | 1.75               | 332                         | 797,823   | 4.16               | 0.48 (0.28-0.83)                       | -                                             |
| ≥ 80                 | 1                                      | 1,374   | 7.28               | 10                          | 13,623    | 7.34               | 1.00 (0.13-7.84)                       | -                                             |
| Total                | 27                                     | 200,431 | 1.35               | 501                         | 2,002,517 | 2.50               |                                        |                                               |

**Pfizer/Moderna, Women**

| Age category (years) | Exposure to vaccine benefits (first dose) |         |                    | Unexposure to vaccine benefits |           |                    | Adjusted incidence rate ratio (95% CI) | Number needed to treat (95% CI) <sup>(b)</sup> |
|----------------------|-------------------------------------------|---------|--------------------|--------------------------------|-----------|--------------------|----------------------------------------|------------------------------------------------|
|                      | # events                                  | # PM    | IR (per 10,000 PM) | # events                       | # PM      | IR (per 10,000 PM) |                                        |                                                |
| < 50                 | 13                                        | 100,665 | 1.29               | 196                            | 490,974   | 3.99               | 0.11 (0.02 to 0.82)                    | 2,815 (2,355-3,496)                            |
| 50-59                | 6                                         | 67,909  | 0.88               | 180                            | 318,755   | 5.65               | 0.08 (0.01 to 0.60)                    | 1,925 (1,623-2,365)                            |
| 60-69                | 9                                         | 48,052  | 1.87               | 178                            | 202,892   | 8.77               | 0.25 (0.09 to 0.66)                    | 1,520 (1,187-2,113)                            |
| 70-79                | 20                                        | 45,489  | 4.40               | 234                            | 164,078   | 14.26              | 0.15 (0.07 to 0.33)                    | 825 (695-1,015)                                |
| ≥ 80                 | 248                                       | 142,079 | 17.46              | 2,248                          | 572,002   | 39.30              | 0.18 (0.04 to 0.71)                    | 310 (291-332)                                  |
| Total                | 296                                       | 404,194 | 7.32               | 3,036                          | 1,748,702 | 17.36              |                                        |                                                |

| Age category (years) | Exposure to vaccine harms (first dose) |         |                    | Unexposure to vaccine harms |           |                    | Adjusted incidence rate ratio (95% CI) | Number needed to harm (95% CI) <sup>(b)</sup> |
|----------------------|----------------------------------------|---------|--------------------|-----------------------------|-----------|--------------------|----------------------------------------|-----------------------------------------------|
|                      | # events                               | # PM    | IR (per 10,000 PM) | # events                    | # PM      | IR (per 10,000 PM) |                                        |                                               |
| < 50                 | 10                                     | 131,525 | 0.76               | 38                          | 1,309,922 | 0.29               | 2.23 (1.09-4.57)                       | 28,026 (12,482-114,225)                       |
| 50-59                | 2                                      | 91,961  | 0.22               | 34                          | 916,009   | 0.37               | 0.49 (0.12-2.10)                       | -                                             |
| 60-69                | 10                                     | 84,627  | 1.18               | 93                          | 843,316   | 1.10               | 0.94 (0.49-1.82)                       | -                                             |
| 70-79                | 16                                     | 85,737  | 1.89               | 273                         | 854,630   | 3.19               | 0.50 (0.30-0.84)                       | -                                             |
| ≥ 80                 | 99                                     | 268,027 | 3.69               | 1385                        | 2,603,444 | 5.32               | 0.69 (0.56-0.84)                       | -                                             |
| Total                | 137                                    | 661,878 | 2.07               | 1823                        | 6,527,321 | 2.79               |                                        |                                               |

**Pfizer/Moderna, Men**

| Age category (years) | Exposure to vaccine benefits (first dose) |         |                    | Unexposure to vaccine benefits |           |                    | Adjusted incidence rate ratio (95% CI) | Number needed to treat (95% CI) <sup>(b)</sup> |
|----------------------|-------------------------------------------|---------|--------------------|--------------------------------|-----------|--------------------|----------------------------------------|------------------------------------------------|
|                      | # events                                  | # PM    | IR (per 10,000 PM) | # events                       | # PM      | IR (per 10,000 PM) |                                        |                                                |
| < 50                 | 8                                         | 61,389  | 1.30               | 98                             | 272,808   | 3.59               | 0.38 (0.05 to 2.83)                    | -                                              |
| 50-59                | 9                                         | 42,272  | 2.13               | 166                            | 171,452   | 9.68               | 0.13 (0.02 to 0.93)                    | 1,187 (976-1,514)                              |
| 60-69                | 21                                        | 44,774  | 4.69               | 315                            | 187,785   | 16.77              | 0.04 (0.01 to 0.30)                    | 621 (552-709)                                  |
| 70-79                | 36                                        | 42,957  | 8.38               | 393                            | 161,173   | 24.38              | 0.16 (0.08 to 0.30)                    | 488 (425-574)                                  |
| ≥ 80                 | 179                                       | 76,801  | 23.31              | 1844                           | 321,868   | 57.29              | 0.20 (0.05 to 0.81)                    | 218 (203-236)                                  |
| Total                | 253                                       | 268,193 |                    | 2816                           | 1,115,086 |                    |                                        |                                                |

| Age category (years) | Exposure to vaccine harms (first dose) |         |                    | Unexposure to vaccine harms |           |                    | Adjusted incidence rate ratio (95% CI) | Number needed to harm (95% CI) <sup>(b)</sup> |
|----------------------|----------------------------------------|---------|--------------------|-----------------------------|-----------|--------------------|----------------------------------------|-----------------------------------------------|
|                      | # events                               | # PM    | IR (per 10,000 PM) | # events                    | # PM      | IR (per 10,000 PM) |                                        |                                               |
| < 50                 | 1                                      | 81,069  | 0.12               | 18                          | 806,954   | 0.22               | 0.48 (0.06-3.79)                       | -                                             |
| 50-59                | 12                                     | 58,442  | 2.05               | 47                          | 581,519   | 0.81               | 2.21 (0.95-5.13)                       | -                                             |
| 60-69                | 23                                     | 80,154  | 2.87               | 175                         | 798,403   | 2.19               | 1.06 (0.68-1.66)                       | -                                             |
| 70-79                | 22                                     | 81,567  | 2.67               | 322                         | 812,848   | 3.96               | 0.61 (0.39-0.94)                       | -                                             |
| ≥ 80                 | 58                                     | 158,754 | 3.65               | 1025                        | 1,530,971 | 6.70               | 0.52 (0.40-0.68)                       | -                                             |
| Total                | 116                                    | 459,986 | 2.52               | 1587                        | 4,530,695 | 3.50               |                                        |                                               |
